# Supplementary material for: Advancing the automation of plant nucleic acid extraction for rapid diagnosis of plant diseases in space
Source: Front Plant Sci. 2023 Jun 14;14:1194753. doi: 10.3389/fpls.2023.1194753 (PMC10304293; doi:10.3389/fpls.2023.1194753)
Supplement: Supplementary Table 1 — DNA concentrations collected for comparisons between OmniLyse®-X tube and microHomogenizer™ to mechanically disrupt plant tissue. [file Table_1.xlsx]

## Sheet: Supplementary Table 1
	Lysis comparison of mH vs OLX
	Approximately 0.2 gram of diced up tomato leaf samples (either 2-3 mm or 6-8 mm) per device were processed in mH (n=3) and OLX (n=3)
	Devices contained beads and samples were lysed in 1X TE buffer at 6 volts for 10 min
	OmniLyse ®-X	Fresh Weight for extraction (g)	Diced up tissue size (mm)	DNA concentration (ng/ul)	Average	Std Dev
	Rep 1	0.201	2-3	30.2
	Rep 2	0.202	2-3	34.7
	Rep 3	0.198	2-3	31.3	32.0667	1.91543
	Rep 1	0.211	6-8	18.2
	Rep 2	0.197	6-8	19.1
	Rep 3	0.199	6-8	17.8	18.3667	0.54365
	microHomogenizerTM	Fresh Weight for extraction (g)	Diced up tissue size (mm)	DNA concentration (ng/ul)	Average	Std Dev
	Rep 1	0.202	2-3	28.5
	Rep 2	0.204	2-3	30.6
	Rep 3	0.196	2-3	32.1	30.4	1.47648
	Rep 1	0.212	6-8	26.7
	Rep 2	0.21	6-8	30.1
	Rep 3	0.199	6-8	31.8	29.5333	2.12027
								Avg
								Size	6-8mm	2-3mm
								OLX	18.3667	32.0667
								mH	29.5333	30.4
								Std dev
								Size	6-8mm	2-3mm
								OLX	0.54365	1.91543
								mH	2.12027	1.47648
	Lysis comparison of mH vs OLX
	0.4 gram of lettuce leaf punches (3mm) per device were processed in mH (n=3) and OLX (n=3)
	Devices contained beads and samples were lysed in 1X TE buffer at 6 volts for 0-5 min
			Qubit ng/uL
	min	0	1	2	5
	Device
	OLX1	2.13	21.3	23.5	26
	OLX2	2.43	21.1	25.9	30.7			mins	0	1	2	5
	OLX3	1.72	20.3	25.1	32.3			OLX	2.09333	20.9	24.8333	29
	OLX avg	2.09333	20.9	24.8333	29.6667			mH	1.95333	26.1	31.2333	34.2333
	std dev	0.356417	0.52915	1.22202	3.27465
	mH1	1.8	18.6	29.6	30.6
	mH2	2.09	32.2	31.9	34.3
	mH3	1.97	27.5	32.2	35.8
	mH avg	1.95333	26.1	31.2333	33.5667
	std dev	0.145717	6.90724	1.42244	2.67644

## Sheet: Supplementary Table 2
BC01 - Healthy Tomato Stem				BC02 - FOL Inoculated Tomato Stem				BC04 - Healthy Tomato Root				BC03 - FOL Inoculated Tomato Roots				BC05 - Healthy Tomato Leaf				BC06 - FOL Inoculated Tomato Leaf
Scientific Name	Percentage of fragments covered by the clade rooted at this taxon	Number of fragments covered by the clade rooted at this taxon		Scientific Name	Percentage of fragments covered by the clade rooted at this taxon	Number of fragments covered by the clade rooted at this taxon		Scientific Name	Percentage of fragments covered by the clade rooted at this taxon	Number of fragments covered by the clade rooted at this taxon		Scientific Name	Percentage of fragments covered by the clade rooted at this taxon	Number of fragments covered by the clade rooted at this taxon		Scientific Name	Percentage of fragments covered by the clade rooted at this taxon	Number of fragments covered by the clade rooted at this taxon		Scientific Name	Percentage of fragments covered by the clade rooted at this taxon	Number of fragments covered by the clade rooted at this taxon
unclassified	62.04	609363		Fusarium oxysporum	59.56	783210		unclassified	66.08	462990		Fusarium oxysporum	90.28	158008		unclassified	63.92	1183576		unclassified	62.82	783210
Pasteurella multocida	0.87	8576		unclassified	23.11	16432		Pasteurella multocida	0.68	4766		Fusarium verticillioides	3.45	6031		Pasteurella multocida	1.87	34712		Fusarium oxysporum	1.32	16432
Escherichia coli	0.59	5812		Fusarium verticillioides	2.19	14614		Clostridium botulinum	0.28	1950		unclassified	2.53	4430		Mycolicibacterium mageritense	0.36	6754		Pasteurella multocida	1.17	14614
Clostridium botulinum	0.32	3097		Fusarium fujikuroi	0.92	3916		Buchnera aphidicola	0.21	1479		Fusarium fujikuroi	1.55	2718		Acinetobacter baumannii	0.34	6226		Clostridium botulinum	0.31	3916
Acinetobacter baumannii	0.28	2768		Pasteurella multocida	0.22	3481		Acinetobacter baumannii	0.2	1430		Fusarium pseudograminearum	0.27	468		Clostridium botulinum	0.33	6067		Acinetobacter baumannii	0.28	3481
Buchnera aphidicola	0.21	2049		Fusarium pseudograminearum	0.19	2481		Blattabacterium cuenoti	0.17	1219		Fusarium venenatum	0.22	385		Buchnera aphidicola	0.19	3460		Buchnera aphidicola	0.2	2481
Blattabacterium cuenoti	0.18	1759		Fusarium venenatum	0.18	2043		Clostridium perfringens	0.15	1024		Fusarium graminearum	0.1	176		Lactiplantibacillus plantarum	0.18	3264		Blattabacterium cuenoti	0.16	2043
Clostridium perfringens	0.14	1356		Clostridium botulinum	0.11	1770		Escherichia coli	0.15	1043		Fusarium sporotrichioides	0.1	171		Synechococcus sp. JA-3-3Ab	0.17	3108		Clostridium perfringens	0.14	1770
Halomonas sp. JS92-SW72	0.14	1347		Fusarium graminearum	0.08	1720		Bacillus cereus	0.12	854						Halomonas sp. JS92-SW72	0.17	3213		Halomonas sp. JS92-SW72	0.14	1720
Bacillus cereus	0.13	1239		Buchnera aphidicola	0.08	1475		Bacillus thuringiensis	0.1	717						Blattabacterium cuenoti	0.15	2739		Bacillus cereus	0.12	1475
Bacillus thuringiensis	0.11	1062		Fusarium sporotrichioides	0.07	1491		Clostridioides difficile	0.1	706						Hydrogenophaga sp. NH-16	0.14	2609		Escherichia coli	0.12	1491
Prochlorococcus marinus	0.11	1048		Acinetobacter baumannii	0.07	1451		Halomonas sp. JS92-SW72	0.1	669						Clostridium perfringens	0.12	2179		Rhizobium lusitanum	0.12	1451
Hydrogenophaga sp. NH-16	0.11	1092		Blattabacterium cuenoti	0.07	1342										Acaryochloris marina	0.12	2253		Bacillus thuringiensis	0.11	1342
Fusarium oxysporum	0.11	1065		Clostridium perfringens	0.06	1426										Escherichia coli	0.12	2158		Hydrogenophaga sp. NH-16	0.11	1426
Clostridioides difficile	0.1	955		Escherichia coli	0.06	1255										Bacillus cereus	0.11	2012		Clostridioides difficile	0.1	1255
Candidatus Erwinia haradaeae	0.1	942		Neurospora crassa	0.04	1189										Prochlorococcus marinus	0.11	2068		Synechococcus sp. JA-3-3Ab	0.1	1189
Tetrapisispora blattae	0.1	995		Botrytis cinerea	0.04	1305														Prochlorococcus marinus	0.1	1305
Naumovozyma dairenensis	0.1	977		Tetrapisispora blattae	0.04	1196														Candidatus Erwinia haradaeae	0.1	1196
Candida dubliniensis	0.1	944		Naumovozyma dairenensis	0.04	1233														Botrytis cinerea	0.1	1233
Botrytis cinerea	0.1	1023		Bacillus cereus	0.04

## Sheet: Supplementary Table 3
BC07 - Healthy Lettuce Roots			BC08 - Pythium Inoculated Lettuce Roots			BC09 - Pythium Culture
Scientific Name	Percentage of fragments covered by the clade rooted at this taxon	Number of fragments covered by the clade rooted at this taxon	Scientific Name	Percentage of fragments covered by the clade rooted at this taxon	Number of fragments covered by the clade rooted at this taxon	Scientific Name	Percentage of fragments covered by the clade rooted at this taxon	Number of fragments covered by the clade rooted at this taxon
unclassified	100	36	unclassified	99.81	1565	root	100	36
			root	0.19	3	cellular organisms	100	36
			cellular organisms	0.19	3	Eukaryota	100	36
			Eukaryota	0.19	3	Sar	100	36
			Sar	0.19	3	Stramenopiles	100	36
			Stramenopiles	0.19	3	Oomycota	100	36
			Oomycota	0.19	3	Pythiales	100	36
			Pythiales	0.19	3	Pythiaceae	100	36
			Pythiaceae	0.19	3	Pythium	100	36
			Pythium	0.19	3	Pythium aphanidermatum	100	36
			Pythium aphanidermatum	0.19	3

## Sheet: Supplementary Table 4
BC07 - Healthy Lettuce Roots			BC08 - Pythium Inoculated Lettuce Roots			BC09 - Pythium Culture
Scientific Name	Percentage of fragments covered by the clade rooted at this taxon	Number of fragments covered by the clade rooted at this taxon	Scientific Name	Percentage of fragments covered by the clade rooted at this taxon	Number of fragments covered by the clade rooted at this taxon	Scientific Name	Percentage of fragments covered by the clade rooted at this taxon	Number of fragments covered by the clade rooted at this taxon
unclassified	86.11	31	unclassified	87.44	1371	Pythium aphanidermatum	100	36
Phytophthora lateralis	2.78	1	Phytophthora lateralis	1.34	21
Pseudoperonospora cubensis	2.78	1	Pseudoperonospora cubensis	1.21	19
Globisporangium acanthophoron	2.78	1	Plasmopara halstedii	0.57	9
			Peronospora belbahrii	0.51	8
			Hyaloperonospora arabidopsidis	0.32	5
			Phytophthora palmivora	0.26	4
			Aphanomyces euteiches	0.26	4
			Phytophthora boehmeriae	0.19	3
			Phytophthora versiformis	0.19	3
			Phytophthora cactorum	0.19	3
			Plasmopara viticola	0.19	3
			Pythium insidiosum	0.19	3
			Phytopythium vexans	0.19	3
			Thraustotheca clavata	0.19	3
			Phytophthora cinnamomi	0.13	2
			Phytophthora constricta	0.13	2
			Phytophthora ramorum	0.13	2
			Phytophthora pistaciae	0.13	2
			Phytophthora brassicae	0.13	2
			Phytophthora taxon totara	0.13	2
			Phytophthora capsici	0.13	2
			Plasmopara muralis	0.13	2
			Hyaloperonospora brassicae	0.13	2
			Globisporangium paddicum	0.13	2
			Pythium plurisporium	0.13	2
			Aphanomyces astaci	0.13	2
			Phytophthora parvispora	0.06	1
			Phytophthora x alni	0.06	1
			Phytophthora cajani	0.06	1
			Phytophthora pisi	0.06	1
			Phytophthora kernoviae	0.06	1
			Phytophthora litchii	0.06	1
			Phytophthora quercina	0.06	1
			Phytophthora syringae	0.06	1
			Phytophthora infestans	0.06	1
			Phytophthora idaei	0.06	1
			Phytophthora fragariae	0.06	1
			Phytophthora tubulina	0.06	1
			Phytophthora megakarya	0.06	1
			Peronospora destructor	0.06	1
			Peronospora tabacina	0.06	1
			Sclerospora graminicola	0.06	1
			Globisporangium nagaii	0.06	1
			Globisporangium spinosum	0.06	1
			Globisporangium sylvaticum	0.06	1
			Globisporangium irregulare	0.06	1
			Globisporangium cryptoirregulare	0.06	1
			Globisporangium acanthophoron	0.06	1
			Globisporangium alternatum	0.06	1
			Globisporangium iwayamae	0.06	1
			Globisporangium camurandrum	0.06	1
			Globisporangium lucens	0.06	1
			Globisporangium cederbergense	0.06	1
			Pythium volutum	0.06	1
			Pythium angustatum	0.06	1
			Pythium sp. CBS 101876	0.06	1
			Pythium apiculatum	0.06	1
			Pythium guiyangense	0.06	1
			Pythium myriotylum	0.06	1
			Pythium lycopersicum	0.06	1
			Pythium arrhenomanes	0.06	1
			Pythium brachiatum	0.06	1
			Phytopythium chamaehyphon	0.06	1
			Phytopythium helicoides	0.06	1
			Phytopythium montanum	0.06	1
			Phytopythium boreale	0.06	1
			Phytopythium mirpurense	0.06	1
			Elongisporangium anandrum	0.06	1
			Pilasporangium apinafurcum	0.06	1
			Aphanomyces stellatus	0.06	1
			Achlya hypogyna	0.06	1
			Lagenidium sp. CBS 127285	0.06	1
			Paralagenidium karlingii	0.06	1
			Albugo candida	0.06	1
